# Supplementary material for: Design optimization of a fluidic thrust vectoring system based on coanda effect using meta-models
Source: publisher site journal article supplement (doi:10.1515/tjj-2024-0090), 2024-12-29
Supplement: Supplementary file 1 [file j_tjj-2024-0090_suppl_001.xlsx]

## Sheet: INFO
Article title	Design Optimization of a Fluidic Thrust Vectoring System based on Coanda Effect using Meta-models
Journal name	INTERNATIONAL JOURNAL OF TURBO & JET-ENGINES
Author names	Emre Kara, Dilek Funda Kurtuluş
Affiliations	Department of Aerospace Engineering, Gaziantep University, Sehitkamil, Gaziantep, 27310, Türkiye.
	Department of Aerospace Engineering, METU, Ankara, 06800, Türkiye.
E-mail address of the corresponding author	emrekara@gantep.edu.tr
File content	Test data (440 case studies) and comparison (Optimization candidate points, CP's with their estimated parameter values by response surface optimization of genetic aggregation meta-model and their comparisons relative to Original Design (Geometry-1))

## Sheet: TABLE
	INPUT PARAMETERS		OUTPUT PARAMETERS
	P1 - parameter-1 (m/s)	P9 -Geo.	P2 - moment around Coanda (N.m)	P3 - performance parameter	P4 - thrust vectoring angle, (rad)	P5 - total thrust (N)	P6 - thrust vectoring efficiency (%)	P7 - thrust_y (N)	P8 - thrust_x (N)
Case number / Parameter	P1	P9	P2	P3	P4	P5	P6	P7	P8
1	27.8232	1	0.39658	1.99744	1.46934	21.8967	10.892	21.7841	2.2178
2	39.388	1	1.28678	1.29317	1.03133	66.4243	28.4954	56.9909	-34.1208
3	31.6519	1	0.613515	1.97569	1.50136	31.4307	15.6775	31.3549	-2.18075
4	35.8577	1	0.932	1.54283	1.20639	87.3792	40.8208	81.6415	-31.1412
5	11.2095	1	0.00825956	0.789087	0.417042	2.39253	0.484556	0.969112	2.18746
6	15.8441	1	0.0502845	1.30108	0.797645	5.54214	1.98329	3.96659	3.8706
7	25.3887	1	0.289964	1.85916	1.3338	17.8947	8.69726	17.3945	4.20131
8	44.7744	1	1.99138	0.960357	0.785028	85.0482	30.0579	60.1159	-60.1604
9	18.8859	1	0.099295	1.47764	0.966093	8.61607	3.54409	7.08819	4.89839
10	23.4621	1	0.220292	1.75082	1.2276	14.8235	6.97952	13.959	4.98814
11	28.6562	1	0.438368	2.04476	1.5158	23.2692	11.617	23.234	1.27907
12	14.0405	1	0.0301872	1.18081	0.689636	4.10952	1.30736	2.61471	3.1704
13	10.7163	1	0.00512847	0.609344	0.315206	2.15237	0.33363	0.66726	2.04633
14	40.446	1	1.40763	1.21537	0.974449	68.4386	28.3128	56.6256	-38.4368
15	36.6674	1	1.00596	1.46517	1.15121	73.6622	33.6362	67.2724	-30.0089
16	41.9198	1	1.58858	1.12021	0.904455	72.8927	28.6501	57.3001	-45.056
17	25.0488	1	0.27679	1.84077	1.31556	17.3234	8.38108	16.7622	4.37362
18	32.6981	1	0.684316	1.92937	1.4775	36.9223	18.3809	36.7617	-3.43954
19	21.4339	1	0.159131	1.631	1.11213	11.8613	5.31767	10.6353	5.25161
20	19.2146	1	0.105962	1.49691	0.984523	9.00024	3.74863	7.49727	4.97948
21	30.637	1	0.5497	2.03212	1.53205	27.4467	13.7131	27.4261	-1.06315
22	10.0656	1	0.00096172	0.135619	0.0680313	1.885	0.0640699	0.12814	1.88064
23	34.9395	1	0.853588	1.45584	1.13189	150.972	-68.3309	-136.662	64.1561
24	38.1422	1	1.15213	1.39973	1.10898	66.2257	29.6442	59.2884	-29.5083
25	17.7254	1	0.0780121	1.40997	0.901419	7.34307	2.87925	5.7585	4.55636
26	14.3676	1	0.0334421	1.20572	0.710914	4.34962	1.41912	2.83824	3.29599
27	24.1801	1	0.24486	1.79358	1.26884	15.8839	7.58264	15.1653	4.72377
28	31.3274	1	0.592648	1.99233	1.51024	30.0004	14.9727	29.9455	-1.81548
29	43.0428	1	1.73806	1.05447	0.855673	77.2	29.1435	58.287	-50.6209
30	22.9319	1	0.203183	1.72111	1.19848	14.006	6.52319	13.0464	5.09496
31	38.7563	1	1.21796	1.3441	1.06842	65.8996	28.8786	57.7572	-31.7312
32	34.9951	1	0.858118	1.49246	1.16076	373.094	-171.084	-342.167	148.73
33	16.917	1	0.0652443	1.36419	0.857375	6.53457	2.47048	4.94097	4.27638
34	10.7858	1	0.00556953	0.640432	0.332321	2.18517	0.356442	0.712885	2.06561
35	41.5218	1	1.53812	1.1447	0.922525	71.5386	28.5127	57.0255	-43.1956
36	33.4445	1	0.737753	1.90229	1.46443	39.3931	19.5852	39.1704	-4.18233
37	28.3854	1	0.424456	2.02969	1.50093	22.8087	11.3765	22.7531	1.59231
38	23.6611	1	0.226981	1.76281	1.23912	15.1193	7.14764	14.2953	4.92334
39	25.5218	1	0.295269	1.86667	1.34117	18.1176	8.82101	17.642	4.12387
40	19.2154	1	0.105974	1.49697	0.98458	9.00117	3.74917	7.49833	4.97957
41	22.6411	1	0.194114	1.70384	1.18185	13.5763	6.28115	12.5623	5.14837
42	11.3886	1	0.00942152	0.837322	0.445841	2.48396	0.535563	1.07113	2.24115
43	37.1807	1	1.05463	1.41207	1.11278	70.7152	31.7134	63.4268	-31.268
44	32.2395	1	0.652636	1.94843	1.48715	34.4056	17.1427	34.2853	-2.87464
45	18.8145	1	0.097914	1.47376	0.962293	8.53584	3.50185	7.0037	4.87943
46	25.7032	1	0.302534	1.87684	1.35116	18.4135	8.98556	17.9711	4.01176
47	39.0388	1	1.24872	1.32029	1.05106	66.0373	28.6585	57.3171	-32.7975
48	44.9679	1	2.02154	0.950283	0.777403	85.9929	30.159	60.3181	-61.2903
49	28.157	1	0.413008	2.01702	1.48841	22.4288	11.1764	22.3528	1.8458
50	16.329	1	0.0567334	1.33006	0.824889	5.97702	2.19498	4.38996	4.05623
51	36.5827	1	0.99801	1.47409	1.15764	74.409	34.0741	68.1482	-29.8752
52	38.3482	1	1.17433	1.37977	1.09439	65.9748	29.3142	58.6283	-30.2554
53	25.8544	1	0.308652	1.88536	1.35952	18.655	9.12012	18.2402	3.91211
54	22.6297	1	0.193776	1.70334	1.18132	13.5597	6.27209	12.5442	5.14868
55	32.4658	1	0.668184	1.9388	1.48225	35.654	17.7572	35.5144	-3.15302
56	15.3564	1	0.0443827	1.27339	0.771191	5.13032	1.78789	3.57578	3.67885
57	11.1739	1	0.00801367	0.777219	0.410155	2.37375	0.473267	0.946535	2.17687
58	29.1899	1	0.466884	2.07597	1.54625	24.1096	12.0511	24.1023	0.591808
59	19.1788	1	0.105227	1.49475	0.982475	8.95935	3.72652	7.45304	4.97212
60	44.3882	1	1.9321	0.980918	0.800563	83.1749	29.8493	59.6986	-57.9149
61	11.8847	1	0.0126128	0.935209	0.507875	2.74185	0.666711	1.33342	2.39577
62	14.4235	1	0.0339916	1.20919	0.714096	4.39064	1.43779	2.87558	3.31794
63	36.2539	1	0.967685	1.50735	1.18146	78.3222	36.2304	72.4608	-29.7289
64	20.8036	1	0.142558	1.59291	1.07579	10.9981	4.83899	9.67799	5.2245
65	24.2522	1	0.247456	1.79759	1.27278	16.006	7.65022	15.3004	4.69979
66	42.9678	1	1.72781	1.05863	0.858764	76.8923	29.1051	58.2102	-50.2394
67	31.9395	1	0.63242	1.96203	1.49421	32.8259	16.3648	32.7297	-2.51168
68	27.5557	1	0.383731	1.98237	1.45453	21.442	10.6486	21.2973	2.48748
69	39.7496	1	1.32771	1.26476	1.01053	66.9559	28.3597	56.7193	-35.581
70	18.8472	1	0.0985331	1.47527	0.963862	8.5731	3.52098	7.04195	4.88969
71	38.0399	1	1.14165	1.40867	1.11544	66.3369	29.7887	59.5774	-29.1739
72	12.1421	1	0.0144094	0.978051	0.536336	2.88593	0.737339	1.47468	2.4807
73	43.0066	1	1.73302	1.05661	0.857271	77.0529	29.1283	58.2565	-50.4314
74	19.6812	1	0.11594	1.52459	1.01093	9.56368	4.05178	8.10357	5.07899
75	35.9082	1	0.936352	1.53907	1.20382	85.8937	40.0873	80.1746	-30.818
76	21.9067	1	0.17228	1.65951	1.1394	12.5168	5.685	11.37	5.23379
77	29.3294	1	0.474558	2.08428	1.55432	24.3154	12.156	24.3121	0.400578
78	34.0523	1	0.783287	1.90384	1.47166	34.6101	17.2201	34.4402	-3.42551
79	15.1744	1	0.0422673	1.26217	0.760801	4.98144	1.71736	3.43471	3.60798
80	27.2425	1	0.36905	1.9648	1.43723	20.9029	10.3584	20.7168	2.78358
81	14.265	1	0.032384	1.19754	0.704012	4.2728	1.38285	2.7657	3.25695
82	34.0703	1	0.784669	1.90551	1.47313	34.2886	17.0626	34.1252	-3.34357
83	42.9648	1	1.72742	1.05876	0.858861	76.8801	29.1029	58.2058	-50.2258
84	38.4813	1	1.18862	1.36757	1.08549	65.8929	29.1421	58.2842	-30.7378
85	35.3684	1	0.888792	1.56264	1.21821	133.157	62.4827	124.965	-45.9828
86	10.4851	1	0.00370987	0.492324	0.251992	2.05005	0.255572	0.511145	1.9853
87	20.7942	1	0.1423	1.59209	1.07508	10.985	4.83137	9.66274	5.22518
88	15	1	0.0402487	1.25029	0.750173	4.83945	1.64968	3.29937	3.5404
89	27.8232	2	0.522693	0.712954	0.524457	53.6652	13.4362	26.8725	46.4524
90	39.388	2	1.66239	0.0114452	0.00912782	128.482	-0.586373	-1.17275	128.477
91	31.6519	2	0.87684	0.0677582	0.0514905	59.4568	1.53005	3.06011	59.378
92	35.8577	2	1.27342	0.0100075	0.00782524	94.0503	-0.367979	-0.735958	94.0474
93	11.2095	2	0.017608	0.165605	0.0875245	13.2477	0.57901	1.15802	13.197
94	15.8441	2	0.0915796	0.356437	0.218519	21.5149	2.33204	4.66409	21.0033
95	25.3887	2	0.36092	0.570002	0.408933	47.6455	9.47266	18.9453	43.7169
96	44.7744	2	2.44373	0.0108363	0.00885793	201.44	-0.892158	-1.78432	201.432
97	18.8859	2	0.159687	0.436689	0.285512	28.583	4.02518	8.05036	27.4259
98	23.4621	2	0.292187	0.535019	0.375131	41.4445	7.59251	15.185	38.5624
99	28.6562	2	0.573081	0.726645	0.538669	56.2253	14.4216	28.8432	48.2634
100	14.0405	2	0.0601643	0.307331	0.179492	17.9089	1.59864	3.19728	17.6212
101	10.7163	2	0.00791459	0.0809319	0.0418651	12.5916	0.263496	0.526993	12.5805
102	40.446	2	1.78823	0.0114098	0.00914802	139.829	-0.639572	-1.27914	139.824
103	36.6674	2	1.35343	0.0108664	0.00853791	100.993	-0.43113	-0.86226	100.99
104	41.9198	2	1.98512	0.0112306	0.0090675	157.958	-0.716131	-1.43226	157.951
105	25.0488	2	0.348317	0.564722	0.403598	46.5106	9.13304	18.2661	42.7737
106	32.6981	2	0.965123	0.0244537	0.0187266	66.8674	0.626064	1.25213	66.8557
107	21.4339	2	0.229468	0.496983	0.338879	35.3849	5.8815	11.763	33.3725
108	19.2146	2	0.168152	0.445416	0.292952	29.4088	4.24633	8.49266	28.1558
109	30.637	2	0.795187	0.150282	0.1133	53.2181	3.00837	6.01674	52.8769
110	10.0656	2	-0.000403848	0.0805844	0.040424	11.8149	-0.238737	-0.477474	11.8052
111	34.9395	2	1.1815	0.0076921	0.00598045	86.0079	-0.257181	-0.514363	86.0064
112	38.1422	2	1.5169	0.0114583	0.00907818	115.477	-0.524151	-1.0483	115.472
113	17.7254	2	0.131441	0.405552	0.259277	25.7579	3.30193	6.60387	24.897
114	14.3676	2	0.0653009	0.315958	0.186295	18.5351	1.71653	3.43305	18.2144
115	24.1801	2	0.316848	0.548829	0.388259	43.6975	8.27144	16.5429	40.445
116	31.3274	2	0.849535	0.0909573	0.0689484	57.2572	1.97233	3.94467	57.1212
117	43.0428	2	2.14868	0.0111045	0.00901102	173.279	-0.7807	-1.5614	173.272
118	22.9319	2	0.274895	0.52518	0.365705	39.8153	7.11914	14.2383	37.1824
119	38.7563	2	1.58803	0.0114742	0.00912082	121.829	-0.555581	-1.11116	121.824
120	34.9951	2	1.18745	0.00795867	0.00618988	86.5391	-0.267832	-0.535663	86.5374
121	16.917	2	0.113255	0.383705	0.241154	23.8876	2.85246	5.70492	23.1964
122	10.7858	2	0.00874426	0.0893349	0.046356	12.6804	0.293802	0.587603	12.6668
123	41.5218	2	1.93169	0.0112644	0.00907805	152.996	-0.694442	-1.38888	152.989
124	33.4445	2	1.03001	0.00889293	0.00684596	72.441	0.247962	0.495924	72.4393
125	28.3854	2	0.553897	0.72067	0.532924	55.5231	14.1044	28.2087	47.8234
126	23.6611	2	0.298856	0.538766	0.37871	42.0678	7.77671	15.5534	39.087
127	25.5218	2	0.366204	0.572656	0.411444	48.0758	9.61354	19.2271	44.0636
128	19.2154	2	0.168175	0.445444	0.292975	29.4116	4.24707	8.49413	28.1584
129	22.6411	2	0.265682	0.519623	0.36043	38.9274	6.86438	13.7288	36.4261
130	11.3886	2	0.0204277	0.182784	0.0973253	13.4992	0.655872	1.31174	13.4354
131	37.1807	2	1.40902	0.011215	0.00883798	105.9	-0.467964	-0.935927	105.896
132	32.2395	2	0.926173	0.0391948	0.0299156	63.5614	0.950597	1.90119	63.533
133	18.8145	2	0.157861	0.434699	0.283838	28.4039	3.97715	7.95429	27.2674
134	25.7032	2	0.373391	0.575908	0.414604	48.6619	9.80118	19.6024	44.5391
135	39.0388	2	1.62205	0.0114552	0.00911928	124.879	-0.569396	-1.13879	124.874
136	44.9679	2	2.47924	0.0108144	0.00884697	204.829	-0.906045	-1.81209	204.821
137	28.157	2	0.541044	0.717796	0.52968	54.7703	13.8365	27.6731	47.2651
138	16.329	2	0.10134	0.370168	0.229575	22.5614	2.56707	5.13414	21.9694
139	36.5827	2	1.34505	0.010803	0.00848392	100.269	-0.425332	-0.850663	100.265
140	38.3482	2	1.54124	0.0114511	0.0090826	117.659	-0.534318	-1.06864	117.654
141	25.8544	2	0.37934	0.578227	0.416956	49.1554	9.95346	19.9069	44.9441
142	22.6297	2	0.265353	0.519497	0.360287	38.8915	6.85546	13.7109	36.3945
143	32.4658	2	0.945378	0.0312231	0.0238706	65.1872	0.777954	1.55591	65.1686
144	15.3564	2	0.0819401	0.340738	0.206358	20.5118	2.1014	4.2028	20.0766
145	11.1739	2	0.0170243	0.161725	0.0853455	13.2005	0.562617	1.12523	13.1524
146	29.1899	2	0.622316	0.719936	0.536231	56.5374	14.4425	28.8849	48.6018
147	19.1788	2	0.167263	0.444642	0.292257	29.3171	4.22333	8.44666	28.0739
148	44.3882	2	2.37574	0.0108777	0.00887769	194.88	-0.865032	-1.73006	194.872
149	11.8847	2	0.0278008	0.218781	0.118811	14.2185	0.842676	1.68535	14.1183
150	14.4235	2	0.0661535	0.317183	0.187315	18.6443	1.73599	3.47198	18.3182
151	36.2539	2	1.31122	0.0104633	0.00820115	97.3106	-0.399025	-0.798049	97.3073
152	20.8036	2	0.211555	0.484498	0.327212	33.6128	5.40165	10.8033	31.8293
153	24.2522	2	0.319591	0.550822	0.390009	43.9169	8.34853	16.6971	40.619
154	42.9678	2	2.13779	0.0111138	0.00901556	172.242	-0.776419	-1.55284	172.235
155	31.9395	2	0.900965	0.0520329	0.0396262	61.4502	1.2172	2.4344	61.4019
156	27.5557	2	0.508449	0.708859	0.52011	52.7712	13.113	26.226	45.793
157	39.7496	2	1.70382	0.0114458	0.00914513	132.183	-0.604408	-1.20882	132.178
158	18.8472	2	0.158656	0.435404	0.284469	28.4879	3.99754	7.99507	27.343
159	38.0399	2	1.50575	0.0114381	0.00905715	114.485	-0.518447	-1.03689	114.48
160	12.1421	2	0.0319129	0.2361	0.129471	14.6147	0.943446	1.88689	14.4924
161	43.0066	2	2.14328	0.0111055	0.00901038	172.757	-0.778295	-1.55659	172.75
162	19.6812	2	0.180851	0.458882	0.304279	30.5958	4.58333	9.16666	29.1903
163	35.9082	2	1.27808	0.0100852	0.00788838	94.4521	-0.372533	-0.745066	94.4491
164	21.9067	2	0.243143	0.505377	0.346985	36.7625	6.2508	12.5016	34.5716
165	29.3294	2	0.699519	0.323556	0.241288	47.8368	5.71538	11.4308	46.451
166	34.0523	2	1.08699	0.000241077	0.000186352	77.4521	0.00721668	0.0144334	77.4521
167	15.1744	2	0.078755	0.336337	0.202734	20.138	2.02737	4.05475	19.7255
168	27.2425	2	0.440748	0.609206	0.445628	53.888	11.6135	23.2271	48.6253
169	14.265	2	0.0636351	0.313081	0.184055	18.3366	1.67796	3.35592	18.0269
170	34.0703	2	1.08881	6.18343e-06	4.78034e-06	77.616	-0.000185515	-0.000371031	77.616
171	42.9648	2	2.13736	0.0111064	0.00900949	172.202	-0.775717	-1.55143	172.195
172	38.4813	2	1.55525	0.0114768	0.00910954	118.892	-0.54152	-1.08304	118.887
173	35.3684	2	1.22304	0.00894141	0.00697056	89.6186	-0.312343	-0.624687	89.6164
174	10.4851	2	0.00281466	0.0071285	0.00364866	12.2814	0.0224052	0.0448105	12.2813
175	20.7942	2	0.211296	0.484311	0.327038	33.5876	5.39482	10.7896	31.8074
176	15	2	0.0757525	0.332073	0.199244	19.7843	1.95793	3.91587	19.3929
177	27.8232	3	0.759338	0.643176	0.473128	54.9403	12.5174	25.0348	48.9049
178	39.388	3	1.86915	0.000435341	0.000347194	108.422	0.0188217	0.0376434	108.422
179	31.6519	3	1.0164	0.698081	0.530482	69.6122	17.6101	35.2203	60.045
180	35.8577	3	1.40552	0.325757	0.254721	74.5622	9.3939	18.7878	72.1563
181	11.2095	3	0.009505	0.0446875	0.0236179	13.3896	0.158102	0.316204	13.3858
182	15.8441	3	0.141996	0.317935	0.194914	21.543	2.08625	4.17251	21.1351
183	25.3887	3	0.622283	0.607451	0.4358	46.5975	9.83523	19.6705	42.2421
184	44.7744	3	2.82719	0.0114239	0.00933825	186.973	-0.872988	-1.74598	186.965
185	18.8859	3	0.287533	0.441373	0.288574	28.3373	4.03219	8.06438	27.1656
186	23.4621	3	0.521841	0.573561	0.402155	40.5936	7.94421	15.8884	37.355
187	28.6562	3	0.810045	0.654577	0.485244	57.9944	13.525	27.05	51.2996
188	14.0405	3	0.0761677	0.23807	0.139041	18.0082	1.24792	2.49583	17.8344
189	10.7163	3	0.00286084	0.0279115	0.0144383	12.7481	-0.0920276	-0.184055	12.7468
190	40.446	3	2.03239	0.00861898	0.00691043	122.057	-0.42173	-0.84346	122.054
191	36.6674	3	1.49956	0.173203	0.136089	78.7378	5.34114	10.6823	78.0098
192	41.9198	3	2.27751	0.0116552	0.00941033	142.15	-0.668831	-1.33766	142.144
193	25.0488	3	0.604198	0.60246	0.430568	45.5179	9.49928	18.9986	41.3634
194	32.6981	3	1.10032	0.705726	0.540443	73.4212	18.8882	37.7764	62.9572
195	21.4339	3	0.418702	0.524741	0.357806	34.8053	6.09475	12.1895	32.6009
196	19.2146	3	0.304428	0.453382	0.298192	29.1325	4.27945	8.5589	27.8468
197	30.637	3	0.941481	0.682698	0.514699	65.6434	16.1572	32.3144	57.1387
198	10.0656	3	9.58973e-06	0.0976778	0.0489986	12.0068	-0.294042	-0.588083	11.9924
199	34.9395	3	1.30767	0.521698	0.405609	74.2967	14.6579	29.3158	68.2684
200	38.1422	3	1.68966	0.0364854	0.0289067	93.2282	1.34727	2.69455	93.1892
201	17.7254	3	0.228803	0.3964	0.253426	25.6275	3.21269	6.42538	24.809
202	14.3676	3	0.0866746	0.253165	0.149271	18.6208	1.38461	2.76922	18.4137
203	24.1801	3	0.558735	0.587879	0.415885	42.8098	8.64757	17.2951	39.1607
204	31.3274	3	0.991811	0.69349	0.525686	68.3518	17.1497	34.2994	59.1229
205	43.0428	3	2.48117	0.0118507	0.00961649	158.742	-0.763259	-1.52652	158.735
206	22.9319	3	0.494825	0.5613	0.390857	38.9775	7.42484	14.8497	36.0379
207	38.7563	3	1.77594	0.0135336	0.0107579	100.511	0.540631	1.08126	100.505
208	34.9951	3	1.31335	0.511028	0.397454	74.2139	14.3631	28.7261	68.4288
209	16.917	3	0.189896	0.363674	0.228564	23.8207	2.69864	5.39729	23.2012
210	10.7858	3	0.00350816	0.0179679	0.00932355	12.8328	-0.0598228	-0.119646	12.8323
211	41.5218	3	2.20921	0.0113169	0.00912035	136.584	-0.62284	-1.24568	136.579
212	33.4445	3	1.16498	0.693275	0.533698	75.4481	19.191	38.382	64.9557
213	28.3854	3	0.793281	0.650873	0.48131	56.9938	13.1924	26.3848	50.5187
214	23.6611	3	0.53201	0.577709	0.406084	41.2063	8.13855	16.2771	37.8552
215	25.5218	3	0.629416	0.609301	0.437772	47.0253	9.96755	19.9351	42.5908
216	19.2154	3	0.304464	0.453404	0.298211	29.134	4.27994	8.55988	27.8482
217	22.6411	3	0.480056	0.554432	0.384575	38.1234	7.15128	14.3026	35.3388
218	11.3886	3	0.0127769	0.0677146	0.0360554	13.6405	0.245854	0.491708	13.6317
219	37.1807	3	1.56328	0.106969	0.0842969	83.1272	3.49953	6.99906	82.832
220	32.2395	3	1.06261	0.704318	0.537574	71.8223	18.3884	36.7769	61.692
221	18.8145	3	0.283865	0.438713	0.286459	28.1669	3.97937	7.95875	27.0191
222	25.7032	3	0.639232	0.612032	0.44061	47.6093	10.1525	20.305	43.0622
223	39.0388	3	1.81758	0.00638192	0.00508052	104.073	0.26437	0.52874	104.071
224	44.9679	3	2.86871	0.0113687	0.00930048	190.382	-0.88531	-1.77062	190.374
225	28.157	3	0.77936	0.647702	0.477955	56.151	12.9137	25.8275	49.8586
226	16.329	3	0.163013	0.339067	0.210286	22.5425	2.35276	4.70551	22.0459
227	36.5827	3	1.4891	0.18769	0.147398	78.1093	5.73574	11.4715	77.2623
228	38.3482	3	1.71842	0.0270207	0.0214319	95.658	1.02499	2.04998	95.636
229	25.8544	3	0.647451	0.614251	0.442933	48.1008	10.3078	20.6156	43.459
230	22.6297	3	0.479479	0.554181	0.384341	38.0906	7.14101	14.282	35.3118
231	32.4658	3	1.08106	0.70558	0.539428	72.6286	18.6526	37.3053	62.3155
232	15.3564	3	0.122336	0.296984	0.17986	20.5531	1.83839	3.67679	20.2216
233	11.1739	3	0.0088675	0.0395341	0.020863	13.3398	0.139144	0.278288	13.3369
234	29.1899	3	0.843869	0.661884	0.492993	59.9964	14.1971	28.3942	52.8521
235	19.1788	3	0.302644	0.452203	0.297227	29.0428	4.25288	8.50575	27.7693
236	44.3882	3	2.74637	0.0115262	0.00940694	180.361	-0.848311	-1.69662	180.353
237	11.8847	3	0.0223922	0.115719	0.0628425	14.3711	0.451263	0.902525	14.3428
238	14.4235	3	0.0885393	0.255718	0.151017	18.7262	1.40862	2.81724	18.5131
239	36.2539	3	1.44979	0.249244	0.195358	76.1122	7.38736	14.7747	74.6644
240	20.8036	3	0.386469	0.506734	0.342229	33.1468	5.56183	11.1237	31.2246
241	24.2522	3	0.562467	0.589201	0.417183	43.0336	8.71831	17.4366	39.3428
242	42.9678	3	2.46662	0.0118538	0.00961589	157.541	-0.757436	-1.51487	157.533
243	31.9395	3	1.03875	0.70156	0.534281	70.7071	18.0028	36.0056	60.853
244	27.5557	3	0.743499	0.639536	0.469246	53.9953	12.2087	24.4175	48.159
245	39.7496	3	1.9241	0.00395095	0.00315678	113.055	-0.178445	-0.356891	113.055
246	18.8472	3	0.285515	0.439866	0.287384	28.2445	4.00288	8.00576	27.0862
247	38.0399	3	1.67576	0.0416126	0.0329505	92.0728	1.51665	3.0333	92.0229
248	12.1421	3	0.0277751	0.135578	0.0743473	14.7702	0.548557	1.09711	14.7294
249	43.0066	3	2.47437	0.0118476	0.00961245	158.185	-0.760262	-1.52052	158.178
250	19.6812	3	0.328582	0.469972	0.311632	30.2747	4.64129	9.28259	28.8165
251	35.9082	3	1.41111	0.315142	0.246496	74.7083	9.11468	18.2294	72.4501
252	21.9067	3	0.442807	0.537843	0.369276	36.1187	6.51835	13.0367	33.6839
253	29.3294	3	0.852858	0.663614	0.494882	60.5337	14.3746	28.7491	53.2712
254	34.0523	3	1.22076	0.655074	0.506371	75.9413	18.416	36.832	66.4115
255	15.1744	3	0.115342	0.289078	0.174248	20.1885	1.75002	3.50003	19.8828
256	27.2425	3	0.725297	0.635372	0.464768	52.8844	11.8518	23.7036	47.2747
257	14.265	3	0.0833044	0.248469	0.146071	18.4279	1.34111	2.68221	18.2316
258	34.0703	3	1.22242	0.653469	0.50519	75.9386	18.3761	36.7523	66.4525
259	42.9648	3	2.46603	0.0118582	0.0096193	157.502	-0.757518	-1.51504	157.495
260	38.4813	3	1.73707	0.0219849	0.0174502	97.2319	0.848314	1.69663	97.2171
261	35.3684	3	1.35238	0.433489	0.33794	73.9251	12.2547	24.5095	69.7439
262	10.4851	3	0.00133977	0.0571057	0.029229	12.4753	-0.182295	-0.36459	12.47
263	20.7942	3	0.385988	0.506457	0.341992	33.1227	5.55408	11.1082	31.2045
264	20	3	0.345034	0.480919	0.320613	31.0804	4.89746	9.79491	29.4966
265	27.8232	4	0.758668	2.02802	1.49184	22.0602	10.9957	21.9914	1.74007
266	39.388	4	1.87543	1.2822	1.02258	64.4196	27.4896	54.9792	-33.5734
267	31.6519	4	1.0681	1.9902	1.51238	35.301	17.6204	35.2408	-2.06093
268	35.8577	4	1.46722	1.5548	1.21575	65.7034	30.8027	61.6054	-22.8409
269	11.2095	4	0.0109356	0.372431	0.196834	4.23185	0.413803	0.827605	4.15014
270	15.8441	4	0.0832968	0.961778	0.589632	7.04276	1.95808	3.91617	5.85356
271	25.3887	4	0.576141	1.8521	1.32874	18.5507	9.00497	18.0099	4.44656
272	44.7744	4	2.69861	0.982514	0.803139	84.0616	30.2428	60.4857	-58.3767
273	18.8859	4	0.180528	1.24352	0.813022	9.89435	3.59347	7.18694	6.80045
274	23.4621	4	0.439489	1.68826	1.18373	15.7245	7.28061	14.5612	5.9356
275	28.6562	4	0.822982	2.06853	1.53342	23.7194	11.8514	23.7028	0.886266
276	14.0405	4	0.0469601	0.781645	0.456508	5.73833	1.26477	2.52955	5.15071
277	10.7163	4	0.00626448	0.23842	0.123332	4.03779	0.248363	0.496725	4.00712
278	40.446	4	2.01396	1.21662	0.975451	67.0765	27.7682	55.5363	-37.6162
279	36.6674	4	1.55417	1.48777	1.16897	63.0715	29.0239	58.0478	-24.6672
280	41.9198	4	2.2234	1.13258	0.914444	71.8724	28.4695	56.9389	-43.8588
281	25.0488	4	0.551415	1.82429	1.30379	18.0687	8.71425	17.4285	4.76729
282	32.6981	4	1.16019	2.00874	1.53829	30.9786	15.4811	30.9622	1.00689
283	21.4339	4	0.308901	1.49239	1.01762	12.9507	5.50963	11.0193	6.80423
284	19.2146	4	0.194528	1.27491	0.838514	10.2556	3.81331	7.62662	6.8566
285	30.637	4	0.982283	2.0396	1.5377	30.7806	15.3819	30.7637	-1.01868
286	10.0656	4	0.00073085	0.0637225	0.0319654	3.83134	-0.0612248	-0.12245	3.82939
287	34.9395	4	1.37296	1.62287	1.26175	74.2892	35.3848	70.7697	-22.595
288	38.1422	4	1.72263	1.36935	1.08491	62.5157	27.6402	55.2803	-29.1941
289	17.7254	4	0.136949	1.13499	0.725624	8.70341	2.8878	5.7756	6.5109
290	14.3676	4	0.0526215	0.816296	0.481304	5.95397	1.37815	2.7563	5.27755
291	24.1801	4	0.489417	1.75107	1.23876	16.8123	7.94701	15.894	5.4802
292	31.3274	4	1.04037	2.00461	1.51955	34.0526	17.0039	34.0079	-1.74414
293	43.0428	4	2.39814	1.07223	0.870086	76.2415	29.1389	58.2778	-49.1575
294	22.9319	4	0.403664	1.63865	1.14106	14.9833	6.8105	13.621	6.24248
295	38.7563	4	1.79647	1.32568	1.05378	63.2785	27.504	55.008	-31.2776
296	34.9951	4	1.37854	1.61952	1.25959	73.4057	34.9398	69.8796	-22.4774
297	16.917	4	0.111677	1.06119	0.666942	7.95432	2.46021	4.92043	6.24984
298	10.7858	4	0.0069051	0.260408	0.135126	4.06327	0.273692	0.547384	4.02623
299	41.5218	4	2.16471	1.15476	0.930626	70.4682	28.2575	56.5151	-42.0929
300	33.4445	4	1.22854	0.943036	0.725969	24.015	-7.97131	-15.9426	17.9598
301	28.3854	4	0.801898	2.0569	1.52105	23.0918	11.5316	23.0632	1.1483
302	23.6611	4	0.453184	1.70587	1.19909	16.0308	7.46804	14.9361	5.82245
303	25.5218	4	0.585877	1.86301	1.33854	18.7345	9.11575	18.2315	4.31223
304	19.2154	4	0.194565	1.2749	0.838519	10.2574	3.81397	7.62795	6.85773
305	22.6411	4	0.194565	1.20887	0.838519	10.2574	6.56083	7.62795	6.85773
306	11.3886	4	0.0127169	0.41183	0.219283	4.30805	0.468566	0.937131	4.20489
307	37.1807	4	1.61135	1.4452	1.13889	62.4111	28.3399	56.6799	-26.1254
308	32.2395	4	1.11932	2.05722	1.57018	35.2232	17.6116	35.2232	-0.0216869
309	18.8145	4	0.177616	1.23684	0.807599	9.81817	3.54745	7.0949	6.78667
310	25.7032	4	0.599233	1.87726	1.35147	19.0056	9.27515	18.5503	4.13513
311	39.0388	4	1.83157	1.30533	1.03915	63.7282	27.466	54.9319	-32.3074
312	44.9679	4	2.73522	0.972102	0.795253	85.0221	30.3546	60.7092	-59.5243
313	28.157	4	0.784245	2.046	1.5098	22.6276	11.2928	22.5855	1.37945
314	16.329	4	0.0953375	1.00652	0.624236	7.44042	2.17438	4.34876	6.03723
315	36.5827	4	1.54499	1.49424	1.17347	63.2001	29.1384	58.2767	-24.4556
316	38.3482	4	1.74722	1.35396	1.07392	62.7087	27.5628	55.1256	-29.8923
317	25.8544	4	0.610319	1.88883	1.36202	19.2299	9.40615	18.8123	3.98563
318	22.6297	4	0.383671	1.60925	1.11606	14.5835	6.55073	13.1015	6.40538
319	32.4658	4	1.13931	2.04376	1.56249	33.7788	16.8888	33.7776	0.28066
320	15.3564	4	0.0722689	0.916086	0.554802	6.66329	1.75503	3.51005	5.66382
321	11.1739	4	0.0105748	0.363734	0.19195	4.21726	0.402271	0.804543	4.13981
322	29.1899	4	0.864912	2.0884	1.55551	25.1786	12.5878	25.1756	0.384912
323	19.1788	4	0.19296	1.27143	0.835691	10.2151	3.78858	7.57715	6.85091
324	44.3882	4	2.62788	1.00252	0.818196	82.2171	30.0057	60.0114	-56.1986
325	11.8847	4	0.0178455	0.503006	0.273163	4.53221	0.611347	1.22269	4.36417
326	14.4235	4	0.0536329	0.822126	0.485514	5.99221	1.39817	2.79634	5.29972
327	36.2539	4	1.50929	1.52217	1.19308	64.1047	29.793	59.5859	-23.6417
328	20.8036	4	0.272927	1.42986	0.965675	12.1411	4.99263	9.98526	6.90663
329	24.2522	4	0.494494	1.75713	1.24413	16.9207	8.01294	16.0259	5.42964
330	42.9678	4	2.38575	1.07675	0.873465	75.9303	29.1025	58.205	-48.7605
331	31.9395	4	1.09303	1.9791	1.50721	35.8335	17.8806	35.7611	-2.27708
332	27.5557	4	0.738167	2.01106	1.47557	21.6788	10.7903	21.5806	2.06129
333	39.7496	4	1.92179	1.25906	1.00598	65.2349	27.5516	55.1031	-34.9177
334	18.8472	4	0.178986	1.24009	0.81021	9.85391	3.56924	7.13849	6.79276
335	38.0399	4	1.7106	1.37678	1.09019	62.4232	27.6758	55.3517	-28.8592
336	12.1421	4	0.0205981	0.541967	0.2972	4.65446	0.681515	1.36303	4.45041
337	43.0066	4	2.39223	1.07426	0.871598	76.0977	29.121	58.242	-48.9768
338	19.6812	4	0.215739	1.32009	0.875331	10.7856	4.14037	8.28074	6.91082
339	35.9082	4	1.47244	1.55121	1.21331	65.5112	30.6848	61.3696	-22.9235
340	21.9067	4	0.337499	1.53884	1.05655	13.5818	5.9126	11.8252	6.68065
341	29.3294	4	0.875965	2.09299	1.56082	25.6117	12.8052	25.6104	0.255565
342	34.0523	4	1.2857	1.62731	1.25791	136.762	65.0611	130.122	-42.0964
343	15.1744	4	0.0683046	0.897717	0.541117	6.52616	1.68079	3.36159	5.5938
344	27.2425	4	0.714347	1.98998	1.45565	21.2552	10.5572	21.1144	2.44206
345	14.265	4	0.0507848	0.805315	0.473431	5.88522	1.34166	2.68332	5.2379
346	34.0703	4	1.28744	1.62961	1.25983	131.755	62.7178	125.436	-40.3137
347	42.9648	4	2.38526	1.07692	0.873593	75.9194	29.1014	58.2029	-48.746
348	38.4813	4	1.76316	1.3446	1.06726	62.8768	27.5363	55.0726	-30.3397
349	35.3684	4	1.41653	1.59295	1.24183	68.9373	32.6203	65.2407	-22.2711
350	10.4851	4	0.00408227	0.149286	0.0764108	3.95536	0.150969	0.301938	3.94382
351	20.7942	4	0.272338	1.42857	0.964661	12.1284	4.98388	9.96776	6.90947
352	30	4	0.929905	2.07619	1.55715	28.0085	14.003	28.0059	-0.382312
353	27.8232	5	1.56408	2.09624	1.54202	22.9583	11.4744	22.9488	-0.66054
354	39.388	5	3.91673	1.07907	0.860582	65.3337	24.7687	49.5374	-42.5973
355	31.6519	5	2.16492	1.34807	1.02442	10.4452	4.46226	8.92452	5.42729
356	35.8577	5	3.02087	1.32095	1.0329	56.5275	24.2725	48.545	-28.9609
357	11.2095	5	0.00208444	0.499491	0.263987	2.53697	-0.330988	-0.661976	2.44908
358	15.8441	5	0.324149	1.56776	0.961139	6.06104	2.48456	4.96911	3.47047
359	25.3887	5	1.24918	2.0795	1.49188	18.7077	9.32473	18.6495	1.47475
360	44.7744	5	5.70971	0.872992	0.713612	88.7203	29.0368	58.0735	-67.0727
361	18.8859	5	0.590479	1.81925	1.18944	9.54569	4.42997	8.85993	3.55271
362	23.4621	5	1.03042	2.02695	1.4212	15.8194	7.82135	15.6427	2.35766
363	28.6562	5	1.68324	2.04989	1.5196	25.7003	12.8333	25.6666	-1.31508
364	14.0405	5	0.107684	0.910368	0.531687	4.06181	1.02964	2.05929	3.50109
365	10.7163	5	0.000946631	0.663152	0.34304	2.40365	-0.404236	-0.808473	2.26361
366	40.446	5	4.221	1.02824	0.824406	69.2512	25.4202	50.8404	-47.0211
367	36.6674	5	3.21153	1.25307	0.984558	57.6241	24.0012	48.0025	-31.8795
368	41.9198	5	4.6795	0.96735	0.781034	75.2791	26.4988	52.9975	-53.4622
369	25.0488	5	1.20883	2.06496	1.47579	18.2051	9.0615	18.123	1.72696
370	32.6981	5	2.35592	1.62801	1.24672	80.4554	38.1337	76.2674	-25.6194
371	21.4339	5	0.824491	1.94154	1.32388	12.863	6.23644	12.4729	3.14386
372	19.2146	5	0.619434	1.83593	1.2075	9.95813	4.65409	9.30817	3.53867
373	30.637	5	1.99169	1.997	1.50558	33.1247	16.5272	33.0543	-2.15879
374	10.0656	5	0.000140494	0.878677	0.440775	2.25871	-0.481829	-0.963658	2.04283
375	34.9395	5	2.81413	1.40974	1.09604	56.6357	25.1861	50.3721	-25.8892
376	38.1422	5	3.58044	1.1504	0.911437	61.2603	24.2096	48.4192	-37.5287
377	17.7254	5	0.490001	1.7512	1.11957	8.15736	3.67046	7.34093	3.55714
378	14.3676	5	0.151603	1.10663	0.652492	4.40828	1.33828	2.67657	3.5027
379	24.1801	5	1.10911	2.02831	1.43489	16.8929	8.36858	16.7372	2.28881
380	31.3274	5	2.10821	2.06387	1.56448	25.2212	12.6103	25.2207	-0.159353
381	43.0428	5	5.05963	0.927294	0.752475	80.2747	27.4318	54.8635	-58.6005
382	22.9319	5	0.974497	2.00342	1.39506	15.0523	7.41026	14.8205	2.63159
383	38.7563	5	3.74286	1.11431	0.885764	63.1784	24.4626	48.9253	-39.9729
384	34.9951	5	2.82621	1.40447	1.09233	56.5902	25.1177	50.2353	-26.0551
385	16.917	5	0.420517	1.69034	1.06236	7.24043	3.16228	6.32456	3.52474
386	10.7858	5	0.00108466	0.638801	0.331475	2.42019	-0.39381	-0.787621	2.28844
387	41.5218	5	4.55137	0.982745	0.792001	73.549	26.1746	52.3493	-51.6625
388	33.4445	5	2.50126	1.56628	1.20576	63.2581	29.545	59.09	-22.5823
389	28.3854	5	1.6438	2.06353	1.52595	24.7065	12.3408	24.6817	-1.10767
390	23.6611	5	1.05192	2.03643	1.43145	16.1056	7.97476	15.9495	2.23697
391	25.5218	5	1.26517	2.08506	1.49808	18.9077	9.42886	18.8577	1.37369
392	19.2154	5	0.619494	1.83589	1.20749	9.95945	4.65468	9.30937	3.53925
393	22.6411	5	0.944484	1.99087	1.38094	14.6292	7.18316	14.3663	2.76073
394	11.3886	5	0.00273401	0.4349	0.231567	2.58852	-0.297037	-0.594073	2.51943
395	37.1807	5	3.33645	1.2149	0.957399	58.6976	23.9984	47.9968	-33.7892
396	32.2395	5	2.27019	1.61352	1.23153	174.992	82.5087	165.017	-58.2368
397	18.8145	5	0.584177	1.81523	1.18526	9.4583	4.38201	8.76403	3.55685
398	25.7032	5	1.28725	2.09321	1.50693	19.1704	9.56566	19.1313	1.22348
399	39.0388	5	3.81995	1.09801	0.874105	64.1219	24.5898	49.1795	-41.146
400	44.9679	5	5.78803	0.86723	0.70946	89.7168	29.2218	58.4437	-68.0694
401	28.157	5	1.61112	2.07597	1.53191	23.9514	11.9667	23.9333	-0.93108
402	16.329	5	0.368718	1.63166	1.01194	6.5904	2.79387	5.58774	3.49435
403	36.5827	5	3.19088	1.26044	0.989862	57.4801	24.0253	48.0505	-31.5454
404	38.3482	5	3.63429	1.13789	0.902539	61.876	24.2833	48.5666	-38.3395
405	25.8544	5	1.30578	2.1	1.51429	19.3834	9.67622	19.3525	1.09462
406	22.6297	5	0.943342	1.9906	1.38054	14.6111	7.17374	14.3475	2.76307
407	32.4658	5	2.31186	1.63238	1.24798	100.687	47.7432	95.4864	-31.9419
408	15.3564	5	0.27628	1.47969	0.896131	5.53495	2.16117	4.32233	3.45733
409	11.1739	5	0.00198157	0.511342	0.269846	2.52626	-0.336729	-0.673457	2.43484
410	29.1899	5	1.76283	2.02772	1.51031	27.9468	13.9478	27.8956	-1.6894
411	19.1788	5	0.616291	1.8343	1.20566	9.91201	4.62928	9.25857	3.53933
412	44.3882	5	5.55698	0.88458	0.721938	86.7533	28.665	57.3301	-65.1106
413	11.8847	5	0.00548208	0.247703	0.134518	2.75032	-0.184426	-0.368851	2.72547
414	14.4235	5	0.160761	1.14389	0.675532	4.47755	1.39993	2.79987	3.49416
415	36.2539	5	3.11319	1.28657	1.00842	56.9562	24.0922	48.1844	-30.3691
416	20.8036	5	0.764366	1.91213	1.29138	12.0214	5.77759	11.5552	3.31539
417	24.2522	5	1.11716	2.03132	1.43827	16.9951	8.42304	16.8461	2.24563
418	42.9678	5	5.03295	0.93015	0.754543	79.9223	27.3716	54.7433	-58.2301
419	31.9395	5	2.21603	1.44706	1.10202	79.5428	-35.481	-70.9619	35.9369
420	27.5557	5	1.52717	2.11375	1.55092	22.267	11.1313	22.2627	-0.442592
421	39.7496	5	4.01874	1.0607	0.847492	66.629	24.9733	49.9466	-44.0995
422	18.8472	5	0.587049	1.81697	1.18711	9.49901	4.40417	8.80834	3.55589
423	38.0399	5	3.55394	1.15669	0.915917	60.9575	24.1734	48.3467	-37.127
424	12.1421	5	0.00802937	0.132837	0.0728441	2.84423	-0.103501	-0.207002	2.83669
425	43.0066	5	6.39622	0.173483	0.140754	68.2893	4.79015	9.58031	-67.6139
426	19.6812	5	1.21128	0.0999029	0.0662443	21.0714	0.69742	1.39484	-21.0252
427	35.9082	5	4.11614	0.156058	0.122065	49.7126	3.02655	6.05311	-49.3428
428	21.9067	5	1.48282	0.108857	0.0747395	23.8279	0.889614	1.77923	-23.7614
429	29.3294	5	2.65228	0.133158	0.0993011	35.5952	1.76442	3.52884	-35.4199
430	34.0523	5	3.65318	0.15021	0.116112	45.3048	2.62431	5.24863	-44.9997
431	15.1744	5	0.757444	0.163109	0.098317	19.7394	0.968797	1.93759	-19.6441
432	27.2425	5	2.27886	0.12502	0.0914511	31.8771	1.45557	2.91114	-31.7439
433	14.265	5	0.68008	0.171174	0.10063	18.8091	0.944786	1.88957	-18.7139
434	34.0703	5	3.65745	0.15027	0.116172	45.3456	2.62802	5.25603	-45.0399
435	42.9648	5	6.37968	0.173392	0.140655	68.1673	4.77823	9.55646	-67.4941
436	38.4813	5	4.83743	0.16321	0.129546	56.2319	3.63212	7.26424	-55.7607
437	35.3684	5	3.97688	0.154403	0.12037	48.3868	2.90513	5.81026	-48.0367
438	10.4851	5	0.000586089	0.740706	0.379124	2.34868	-0.434631	-0.869262	2.1819
439	20.7942	5	0.763491	1.91187	1.29102	12.0077	5.77039	11.5408	3.31586
440	45	5	5.80112	0.866345	0.708828	89.8773	29.2526	58.5051	-68.2281

## Sheet: Comparison
	CP1	CP2	CP3	Org.	Diff.
P1 – parameter-1 (m/s)	39.2306	40.8303	39.4468	39.75	-1.32386	2.64591	-0.76858
P9 – Geometry	4	4	4	1	vs. CP1	vs. CP2	vs. CP3
P2 – moment around Coanda (N.m)	1.94016	2.26926	1.97127	1.32771	31.567	41.4914	32.647
P3 – performance parameter	1.32821	1.22043	1.31258	1.26476	4.77732	-3.63173	3.64313
P4 – thrust vectoring angle, (rad)	1.05789	0.97964	1.0466	1.01053	4.47628	-3.15353	3.446
P5 – total thrust (N)	61.9412	67.5827	62.401	66.9559	-8.09579	0.927552	-7.2994
P6 – thrust vectoring efficiency (%)	30.8156	28.5694	30.5613	28.3597	7.96991	0.734107	7.20408
P7 – thrust_y (N)	61.6125	57.1195	61.1029	56.7193	7.94182	0.700525	7.17415
P8 – thrust_x (N)	-40.6611	-47.398	-41.3709	-35.581	12.4939	24.9314	13.9952
